# Supplementary material for: Immuno-profiling and cellular spatial analysis using five immune oncology multiplex immunofluorescence panels for paraffin tumor tissue
Source: PubMed Central journal article supplement (PMC8055659; doi:10.1038/s41598-021-88156-0), 2021-04-19

Panel 1

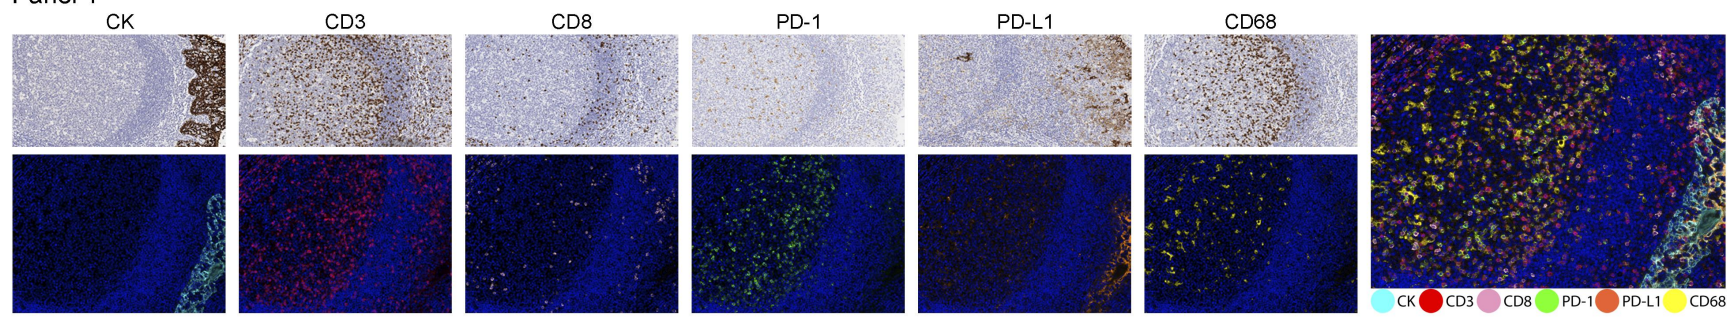

Panel 2

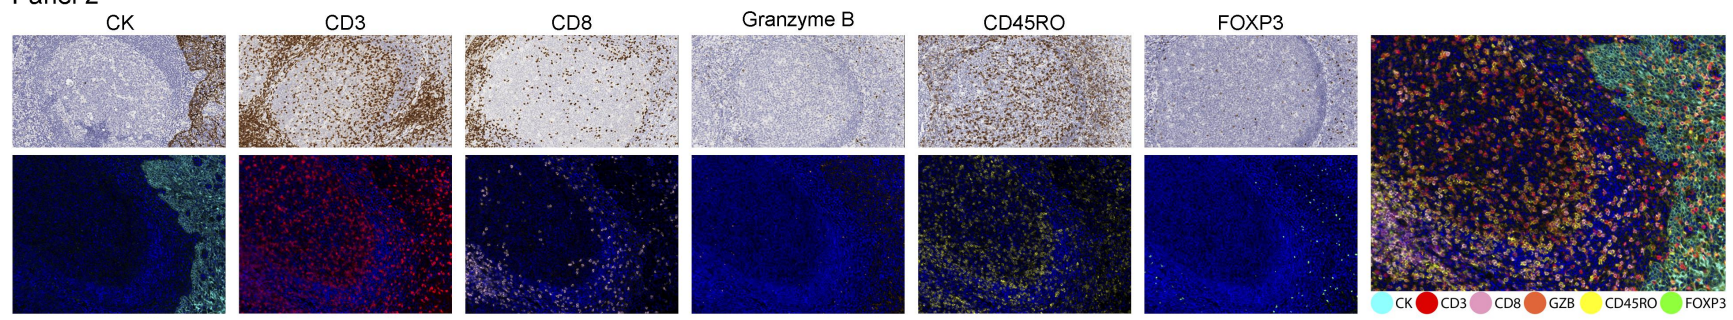

Panel 3

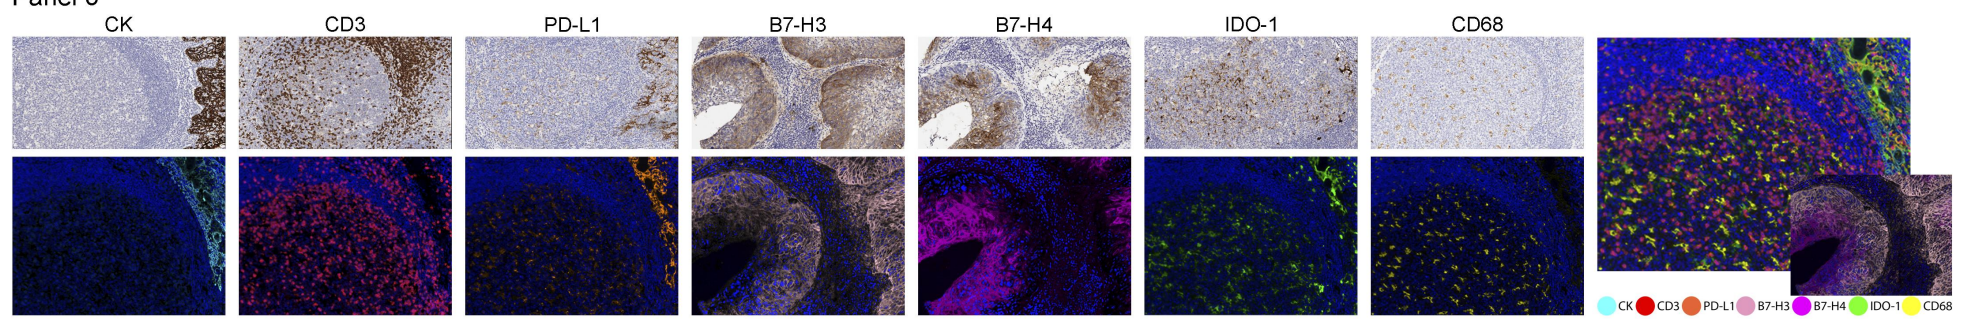

Panel 4

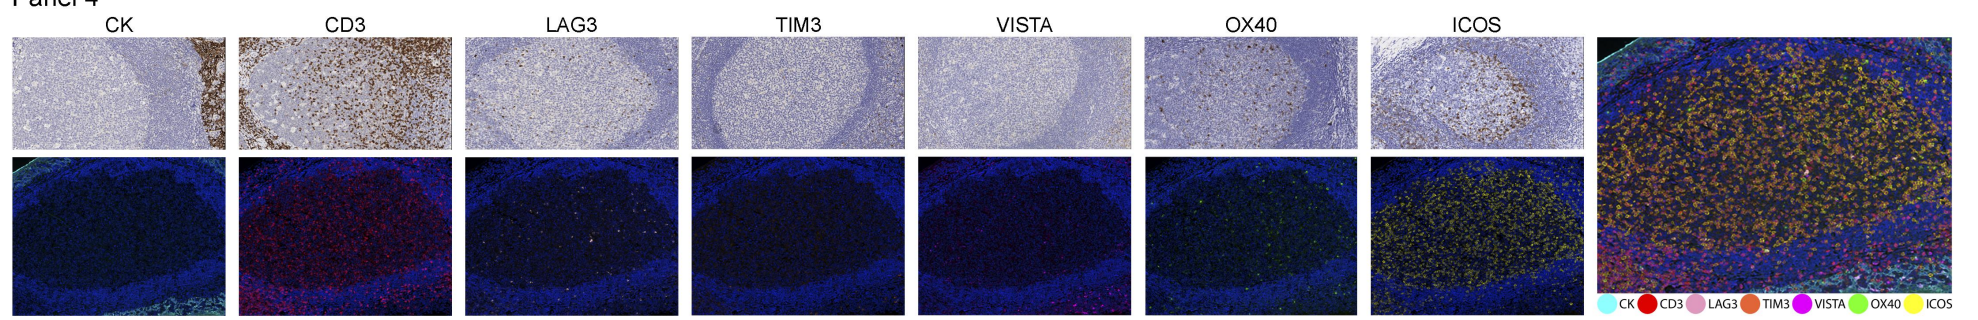

Panel 5

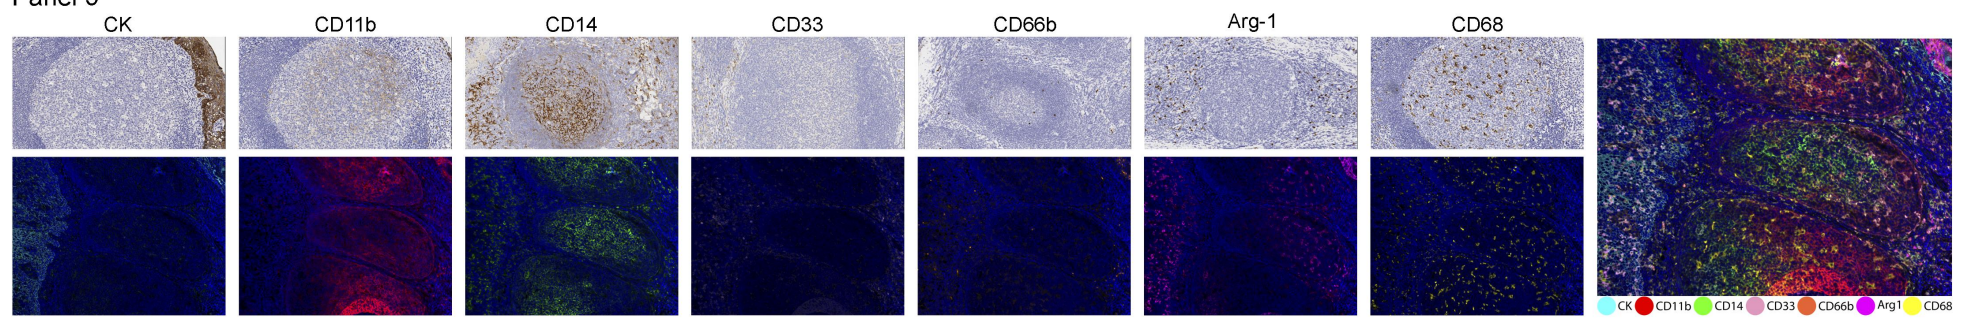

Supplement: 41598_2021_88156_MOESM4_ESM.pdf [file 41598_2021_88156_MOESM4_ESM.pdf]
